# Supplementary material for: GONAD: Genome-editing via Oviductal Nucleic Acids Delivery system: a novel microinjection independent genome engineering method in mice
Source: PubMed Central journal article supplement (PMC4476150; doi:10.1038/srep11406), 2015-06-22
Supplement: srep11406-s1.pdf [file srep11406-s1.pdf]

## **Supplementary Information**

Genome-editing via Oviductal Nucleic Acids Delivery (GONAD) system: a novel microinjection-independent genome engineering method in mice

Gou Takahashi, Channabasavaiah B Gurumurthy, Kenta Wada, Hiromi Miura, Masahiro Sato, Masato Ohtsuka

## Supplementary Tables

### Supplementary Table S1

**Supplementary Table S1 | Delivery of eGFP mRNA to pre-implantation embryos in oviducts *in vitro*<sup>1</sup>**

| Day 1.5 : 2-cell stages |        |                       | Day 2.5 : 8-cell to16-cell stages                                             | Day 3.5 : morula to blastocyst stages                                         |
|-------------------------|--------|-----------------------|-------------------------------------------------------------------------------|-------------------------------------------------------------------------------|
| No. of embryos recoverd |        |                       | No. of embryos normally developed<br>(No. of embryos showing<br>fluorescence) | No. of embryos normally developed<br>(No. of embryos showing<br>fluorescence) |
| Total                   | Normal | Abnormal <sup>2</sup> |                                                                               |                                                                               |
| 27                      | 16     | 11                    | 16 (5)                                                                        | 16 (4)                                                                        |

<sup>1</sup>eGFP mRNA (500 ng/ $\mu$ L) was electroporated into a dissected oviduct isolated from C57BL/6N mice (A-#01) as described in Methods. 2-cell embryos were flushed from the treated oviducts and cultured for two days up to morula or blastocyst stages.

<sup>2</sup>Abnomal embryos were defined as those showing fragmentation, developmental arrest or degeneration.

## Supplementary Table S2

**Supplementary Table S2 | Delivery of eGFP mRNA to pre-implantation embryos in oviducts *in situ*<sup>1</sup>**

| Group              | Mice  | Fluorescence of oviducts <sup>2</sup> | Day 2.5 : 8-cell to 16-cell stages                            |         |                       | Day 3.5 : morula to blastocyst stages                          |         |                       |
|--------------------|-------|---------------------------------------|---------------------------------------------------------------|---------|-----------------------|----------------------------------------------------------------|---------|-----------------------|
|                    |       |                                       | No. of embryos recoverd (No. of embryos showing fluorescence) |         |                       | No. of embryos developed (No. of embryos showing fluorescence) |         |                       |
|                    |       |                                       | Total                                                         | Normal  | Abnormal <sup>3</sup> | Total                                                          | Normal  | Abnormal <sup>3</sup> |
| Experimental group | B-#01 | +                                     | 11 (1)                                                        | 6 (0)   | 5 (1)                 | 11 (1)                                                         | 5 (0)   | 6 (1)                 |
|                    | B-#02 | +                                     | 8 (6)                                                         | 3 (3)   | 5 (3)                 | 8 (4)                                                          | 2 (2)   | 6 (2)                 |
|                    | B-#03 | +                                     | 9 (1)                                                         | 2 (1)   | 7 (0)                 | 9 (1)                                                          | 2 (1)   | 7 (0)                 |
|                    | B-#04 | +                                     | 4 (0)                                                         | 0 (0)   | 4 (0)                 | 4 (0)                                                          | 0 (0)   | 4 (0)                 |
|                    | B-#05 | +                                     | 13 (5)                                                        | 10 (4)  | 3 (1)                 | 13 (4)                                                         | 10 (3)  | 3 (1)                 |
|                    | B-#06 | +                                     | 7 (0)                                                         | 4 (0)   | 3 (0)                 | 7 (0)                                                          | 4 (0)   | 3 (0)                 |
|                    | Total |                                       |                                                               | 52 (13) | 25 (8)                | 27 (5)                                                         | 52 (10) | 23 (6)                |
| Control group      | B-#07 | -                                     | 15                                                            | 13      | 2                     | 15                                                             | 13      | 2                     |
|                    | B-#08 | -                                     | 17                                                            | 17      | 0                     | 17                                                             | 17      | 0                     |
|                    | B-#09 | -                                     | 14                                                            | 14      | 0                     | 14                                                             | 14      | 0                     |
|                    | Total |                                       |                                                               | 46      | 44                    | 2                                                              | 46      | 44                    |

<sup>1</sup>eGFP mRNA (500 ng/μL) was electroporated into an intact oviduct of ICR mice as described in Methods. One day after electroporation, embryos were flushed from treated oviducts and then cultured up to morula to blastocyst stages. No electroporation was performed for the control group.

<sup>2</sup>At least one oviduct of the two oviducts per mouse exhibiting fluorescence was defined as +.

<sup>3</sup>Abnormal embryos were defined those showing fragmentation, developmental arrest or degeneration.

## Supplementary Table S3

**Supplementary Table S3 | Delivery of CRISPR/Cas9 RNAs to pre-implantation embryos in oviducts *in vitro*<sup>1</sup>**

| Group                 | Mice  | RNAs injected<br>(concentration)                    | Day 1.5 : 2-cell stage  |        |                       | Day 2.5 : 8-cell to 16-cell stages       | Day 3.5 : morula to blastocyst stages    | No. of embryos<br>showing <i>indel</i><br>mutation <sup>3</sup> |
|-----------------------|-------|-----------------------------------------------------|-------------------------|--------|-----------------------|------------------------------------------|------------------------------------------|-----------------------------------------------------------------|
|                       |       |                                                     | No. of embryos recoverd |        |                       | No. of embryos normally<br>developed     | No. of embryos normally developed        |                                                                 |
|                       |       |                                                     | Total                   | Normal | Abnormal <sup>2</sup> | (No. of embryos showing<br>fluorescence) | (No. of embryos showing<br>fluorescence) |                                                                 |
| Experimental<br>group | C-#01 |                                                     | 13                      | 12     | 1                     | 12 (6)                                   | 12 (6)                                   | 1                                                               |
|                       | C-#02 | eGFP mRNA (150 ng/μl)                               | 24                      | 13     | 11                    | 10 (1)                                   | 10 (1)                                   | 0                                                               |
|                       | C-#03 | Cas9 mRNA (500 ng/μl)                               | 12                      | 12     | 0                     | 12 (2)                                   | 11 (2)                                   | 0                                                               |
|                       | C-#04 | Hprt_Cr1_sgRNA (50 ng/μl)                           | 26                      | 22     | 4                     | 22 (5)                                   | 22 (5)                                   | 0                                                               |
|                       | C-#05 |                                                     | 15                      | 10     | 5                     | 9 (0)                                    | 9 (0)                                    | 0                                                               |
|                       | C-#06 | eGFP mRNA (200 ng/μl)                               | 21                      | 16     | 5                     | 16 (1)                                   | 16 (1)                                   | 0                                                               |
|                       | C-#07 | Cas9 mRNA (400 ng/μl)<br>Hprt_Cr1_sgRNA (100 ng/μl) | 12                      | 5      | 7                     | 5 (2)                                    | 5 (2)                                    | 1                                                               |
|                       | C-#08 | Cas9_mRNA (923 ng/μl)                               | 6                       | 6      | 0                     | 6 (NA)                                   | 6 (NA)                                   | 0                                                               |
|                       | C-#09 | eEF2_Cr1_sgRNA (243 ng/μl)                          | 10                      | 10     | 0                     | 10 (NA)                                  | 10 (NA)                                  | 2                                                               |
|                       | C-#10 | Cas9_mRNA (500 ng/μl)                               | 24                      | 24     | 0                     | 24 (NA)                                  | 24 (NA)                                  | 0                                                               |
|                       | C-#11 | eEF2_Cr2_sgRNA (409 ng/μl)                          | 10                      | 10     | 0                     | 9 (NA)                                   | 9 (NA)                                   | 0                                                               |
|                       | C-#12 | Cas9 mRNA (444 ng/μl)                               | 13                      | 8      | 5                     | 8 (NA)                                   | 5 (NA)                                   | 0                                                               |
|                       | C-#13 | eGFP_sgRNA (133 ng/μl)                              | 17                      | 10     | 7                     | 8 (NA)                                   | 7 (NA)                                   | 1                                                               |
| Control group         | C-#14 | -                                                   | 16                      | 5      | 11                    | 5                                        | 5                                        | N.D.                                                            |
|                       | C-#15 |                                                     | 8                       | 7      | 1                     | 7                                        | 7                                        | N.D.                                                            |

<sup>1</sup>RNAs were electroporated into a dissected oviduct isolated from C57BL/6N mice as described in Methods. 2-cell embryos were flushed from treated oviducts and then cultured for two days up to morula to blastocyst stages. No electroporation was performed for the control group.

<sup>2</sup>Abnormal embryos were defined those showing fragmentation, developmental arrest or degeneration.

<sup>3</sup>*Indel* mutation analysis was performed using Surveyor- or T7E1-assay from genomic DNA of separate embryos. Sequencing was performed to confirm the mutations in some cases. N.D.= not done.

Supplementary Table S4

**Supplementary Table S4 | Primer sets for sgRNA synthesis, Surveyor- and T7E1-assay**

|                                                | Target           | Primer name                  | Primer sequence (5' to 3')                                                      | Product size |
|------------------------------------------------|------------------|------------------------------|---------------------------------------------------------------------------------|--------------|
| Primer sets for<br>sgRNA synthesis             | eGFP             | F                            | M940<br>TAATACGACTCACTATAGGGACC<br>AGGATGGGCACCACCCGTTTTA<br>GAGCTAGAAATAGCAAG  | 122-bp       |
|                                                |                  | R                            | M939<br>AAAAAAAGCACCGACTCGG                                                     |              |
|                                                | Hprt_Cr1         | F                            | M938<br>TAATACGACTCACTATAGG                                                     | 122-bp       |
|                                                |                  | R                            | M939<br>AAAAAAAGCACCGACTCGG                                                     |              |
|                                                | eEF2_Cr1         | F                            | PP105<br>TAATACGACTCACTATAGGGCTA<br>CCGGAAAGGGCCCGGAGTTTTA<br>GAGCTAGAAATAGCAAG | 122-bp       |
|                                                |                  | R                            | M939<br>AAAAAAAGCACCGACTCGG                                                     |              |
|                                                | eEF2_Cr2         | F                            | PP106<br>TAATACGACTCACTATAGGGGGA<br>GCGACTTCCCAAGGCTGTTTTA<br>GAGCTAGAAATAGCAAG | 122-bp       |
|                                                |                  | R                            | M939<br>AAAAAAAGCACCGACTCGG                                                     |              |
| Primer sets for<br>Surveyor- and<br>T7E1-assay | eGFP_1st PCR     | 1F                           | M212<br>CTCCTGGGCAACGTGCTGGT                                                    | 376-bp       |
|                                                |                  | 1R                           | M495<br>AAGAAGATGGTGCGCTCCTG                                                    |              |
|                                                | eGFP_2nd PCR     | 2F                           | M389<br>TCGCCACCATGGTGAGCAAGG<br>GCGAG                                          | 162-bp       |
|                                                |                  | 2R                           | M026*<br>GGTGGTGCAGATGAACTTCAG                                                  |              |
|                                                | Hprt_Cr1_1st PCR | 1F                           | M925<br>TGATGCAGGACGATTTCAAG                                                    | 609-bp       |
|                                                |                  | 1R                           | M926<br>GGATGGTTGTGAGCCATGAT                                                    |              |
|                                                | Hprt_Cr1_2nd PCR | 2F                           | M949*<br>GCCAGCCAGATCCTATCTAAA                                                  | 445-bp       |
|                                                |                  | 2R                           | M950<br>TGACAAGAAGATGGGAATGG                                                    |              |
|                                                | eEF2_Cr1_1st PCR | 1F                           | PP113<br>ATATCTGCGCGTCCCTGA                                                     | 525-bp       |
|                                                |                  | 1R                           | PP114<br>TGAGGCTCAAGTCACATAACC                                                  |              |
|                                                | eEF2_Cr1_2nd PCR | 2F                           | PP115*<br>TTGTGCTTGGTGATGTGG                                                    | 301-bp       |
|                                                |                  | 2R                           | PP116<br>CACACACCTCTTCCCAAAA                                                    |              |
| eEF2_Cr2_1st PCR                               | 1F               | PP117<br>TGGGGAGACCGGTGAGTA  | 527-bp                                                                          |              |
|                                                | 1R               | PP118<br>GAGGCCCTCGTATAGCA   |                                                                                 |              |
| eEF2_Cr2_2nd PCR                               | 2F               | PP119<br>GCCAATGGCAAGTTCAGTA | 301-bp                                                                          |              |
|                                                | 2R               | PP120<br>GCCTTGAGCAATGGCTTG  |                                                                                 |              |

\*Primers used for direct sequencing.

Supplementary Figures

Supplementary Figure S1

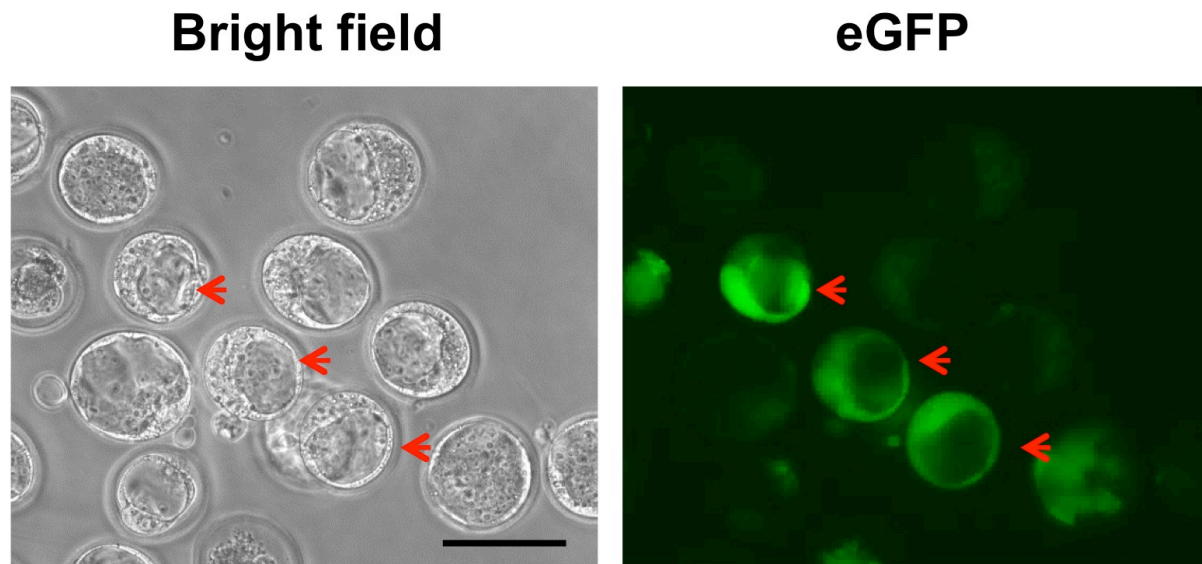

**Supplementary Figure S1 | eGFP expression in 8- to 16-cell stage embryos recovered from the dissected oviducts that were *in vitro* electroporated with eGFP mRNA.** The embryos were derived from A-#01 mouse (C57BL/6N strain) shown in Supplementary Table S1. The embryos exhibiting fluorescence throughout are shown with red arrows. Scale bar = 100  $\mu$ m.

Supplementary Figure S2

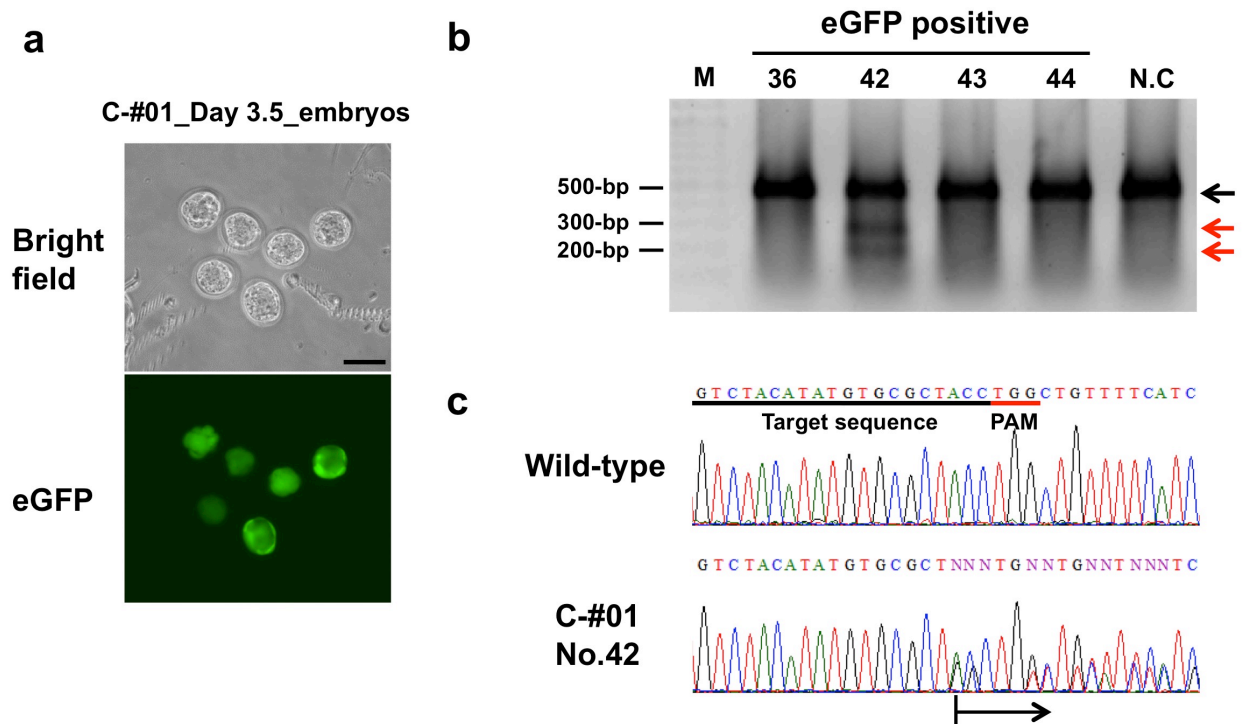

**Supplementary Figure S2 | CRISPR/Cas9-mediated disruption of *Hprt* locus achieved through *in vitro* electroporation of oviducts.** (a) eGFP fluorescence in the blastocysts, one day after culturing of embryos recovered from an *in vitro* electroporated mouse with eGFP mRNA (used as an indicator of electroporation), Cas9 mRNA and *Hprt*\_Cr1 sgRNA (C-#01 mouse: Supplementary Table S3). Scale bar = 100  $\mu$ m. (b) Agarose gel electrophoresis of a few Surveyor-treated PCR products derived from eGFP fluorescence-positive embryos (C-#01\_No.36, 42, 43 and 44). The red arrows indicate the cleavage products generated in Surveyor assay and the wild-type sized band is indicated by a black arrow M: 100-bp DNA ladder markers. N.C: a Negative Control embryo derived from a non-instilled and non-electroporated mouse. (c) Direct sequencing of the PCR products from wild-type mouse or a mutated blastocyst (C-#01\_No.42, shown in (b)). The black arrow below the electropherogram shows overlapping peaks indicative of *indel* mutations (see text for details).

Supplementary Figure S3

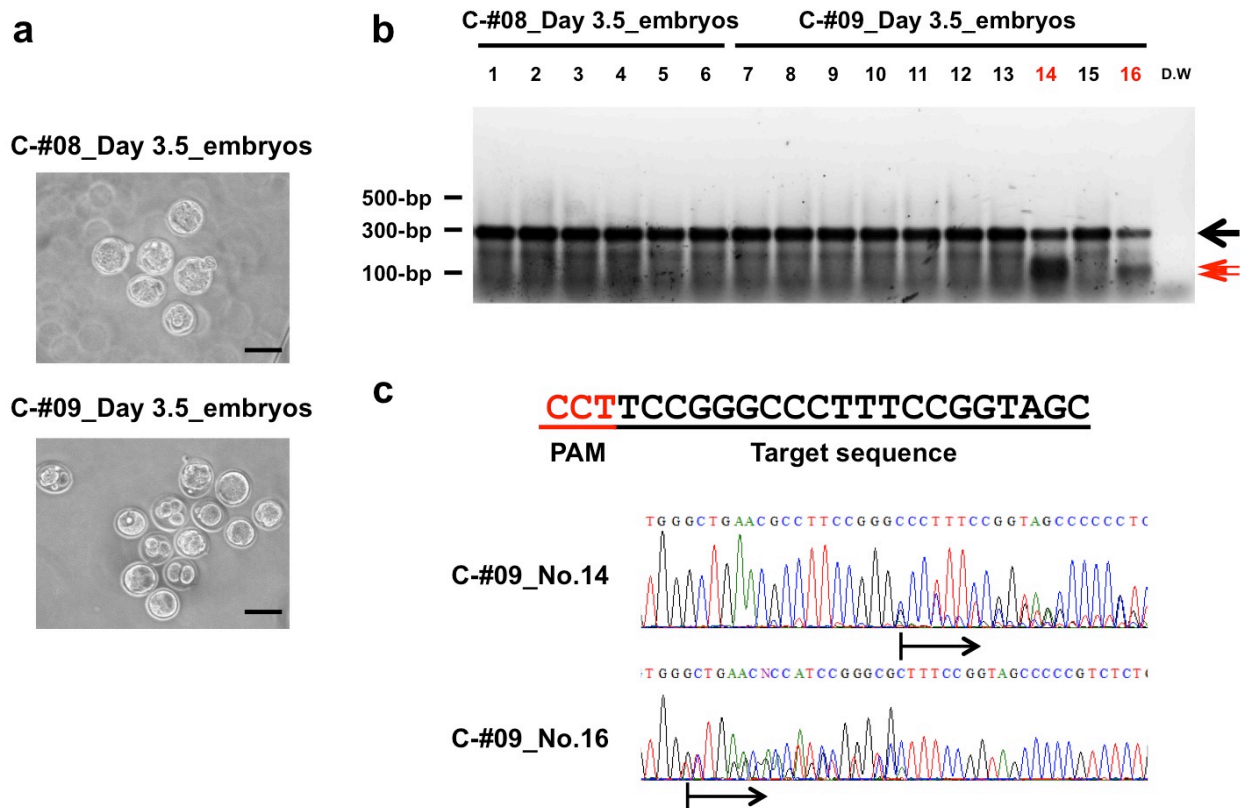

**Supplementary Figure S3 | CRISPR/Cas9-mediated disruption of *eEF2* locus achieved through *in vitro* electroporation of oviducts.** (a) Bright field micrograph of embryos collected and cultured for two-days after *in vitro* electroporation of CRISPR/Cas9 RNAs against the *eEF2* gene (eGFP mRNA, as an indicator of electroporation, was not included in this experiment). The embryos from two different mice (C57BL/6N strain) are shown: the upper panel embryos were recovered from the C-#08 mouse (Supplementary Table S3) and the bottom panel embryos were recovered from the C-#09 mouse. Scale bars = 100  $\mu$ m. (b) Agarose gel electrophoresis of T7E1-treated PCR products derived from the embryos shown in (a). The red arrows indicate the cleavage products generated in T7E1 assay and the wild-type sized band is indicated by a black arrow. D.W: distilled water used as negative control. M: 100-bp DNA Ladder. (c) Direct sequencing of the PCR products of the target region amplified from samples C-#09\_No.14 and \_No.16. The black arrow below the electropherogram shows overlapping peaks indicative of *indel* mutations (see text for details).



Supplementary Figure S4

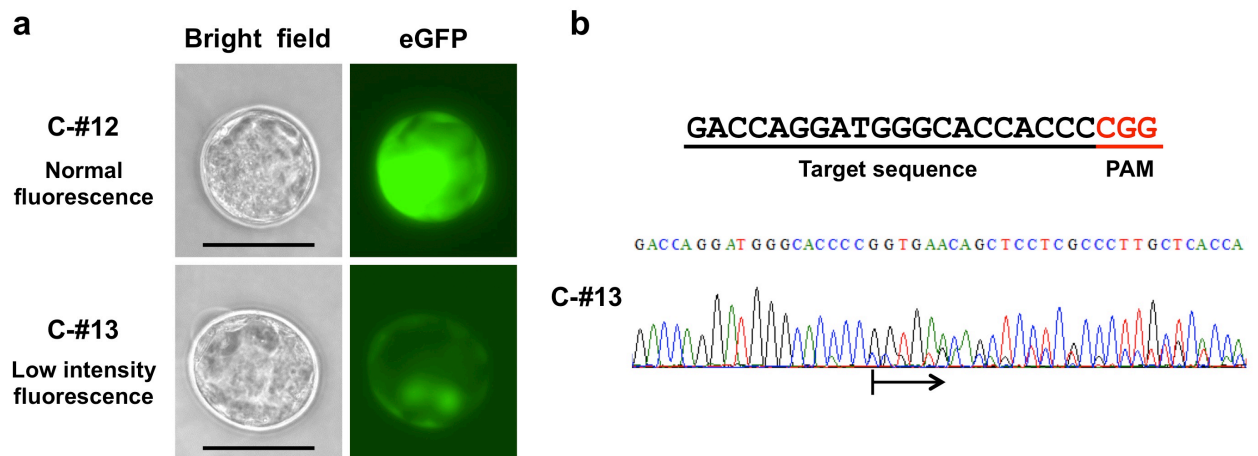

**Supplementary Figure S4 | CRISPR/Cas9-mediated disruption of eGFP transgene achieved through *in vitro* electroporation of oviducts.** (a) eGFP fluorescence in the blastocysts, two-days after culturing of embryos recovered from an *in vitro* electroporated mouse (C57BL/6N strain mated with hemizygote eGFP Tg males) with Cas9 mRNA, and eGFP sgRNA. One embryos each from two different mice are shown: the upper panel embryo showing normal eGFP fluorescence recovered from the C-#12 mouse (Supplementary Table S3) and the bottom panel embryo showing greatly reduced fluorescence was recovered from the C-#13 mouse. Scale bars: 100  $\mu$ m. (b) Direct sequencing of the PCR product amplified from the target region from bottom panel's embryo in (a). The black arrow below the electropherogram shows overlapping peaks indicative of *indel* mutations (see text for details).

Supplementary Figure S5

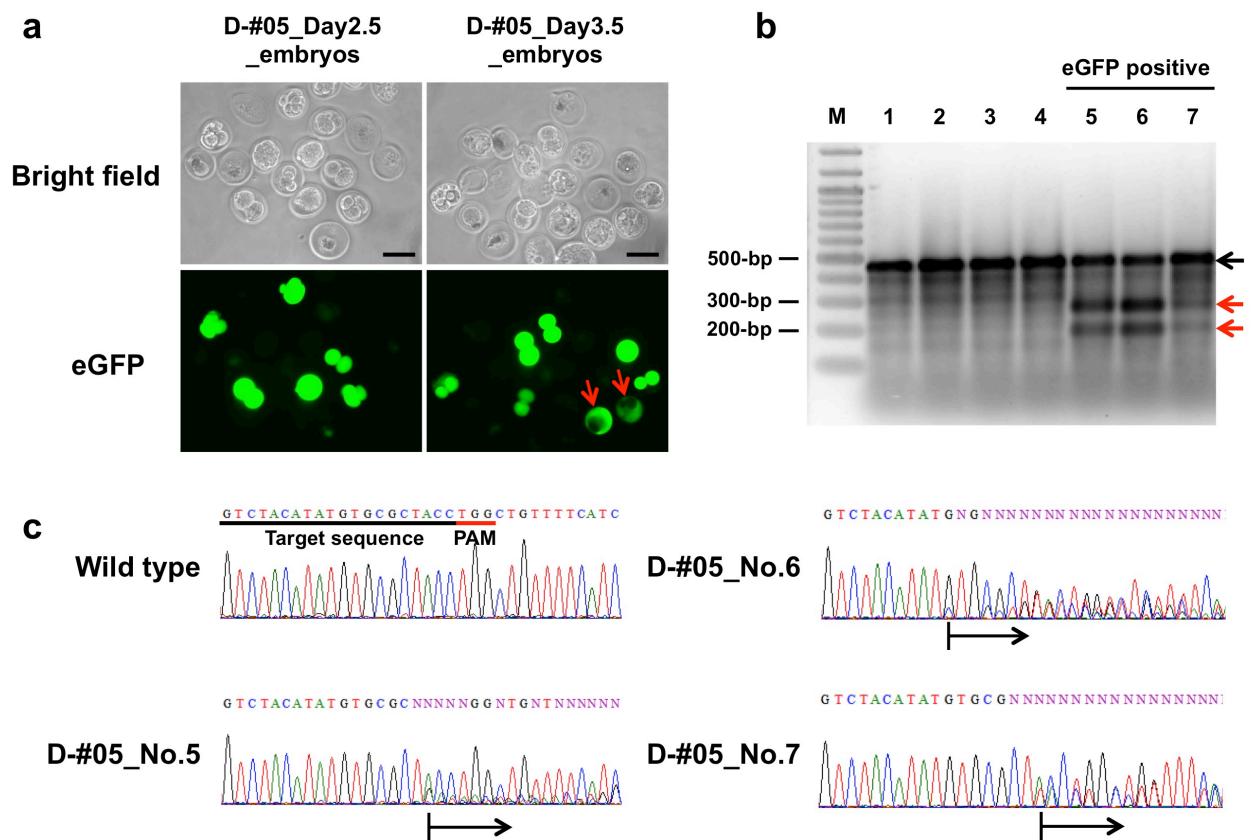

**Supplementary Figure S5 | CRISPR/Cas9 mediated disruption of *Hprt* locus using the GONAD system.** (a) eGFP fluorescence at the 8-cell to 16-cell embryos (left side panels) and blastocyst embryos (right side panels) that were collected from GONAD procedure performed using eGFP mRNA (used as an indicator of electroporation), Cas9 mRNA and *Hprt*\_Cr1 sgRNA (Table 1). Scale bars = 100  $\mu$ m. (b) Agarose gel electrophoresis of T7E1-treated PCR products derived from 7 selected blastocysts. The red arrows indicate the cleavage products generated in T7E1 assay and the wild-type sized band is indicated by a black arrow. M: 100-bp DNA ladder marker. (c) Direct sequencing of PCR products amplified from the target region from wild-type, D-#05\_No.5, \_No.6, and \_No.7 samples. The black arrow below the electropherogram shows overlapping peaks indicative of *indel* mutations (see text for details).

Supplementary Figure S6

| Founder no. | Target sequence                      | PAM                          |            |
|-------------|--------------------------------------|------------------------------|------------|
|             | TTACGTCGCCGTCCAGCTCGACCAGGATGGGCACCA | CCCGGTGAACAGCTCCTCGCCCTT     | WT         |
| 1 (Fig.3)   | TTACGTCGCCGTCCAGCTCGACCAGGATGGGCACC  | -----CGGTGAACAGCTCCTCGCCCTT  | $\Delta 4$ |
| 2 (Fig.3)   | TTACGTCGCCGTCCAGCTCGACCAGGATGGGC     | -----CCGGTGAACAGCTCCTCGCCCTT | $\Delta 6$ |
| 3 (Fig.3)   | TTACGTCGCCGTCCAGCTCGACCAGGATGGGCACC  | ----CCGGTGAACAGCTCCTCGCCCTT  | $\Delta 3$ |
| 4 (Fig.3)   | TTACGTCGCCGTCCAGCTCGACCAGGATGGGCACC  | ----CCGGTGAACAGCTCCTCGCCCTT  | $\Delta 3$ |
| 3 (Fig.4)   | TTACGTCGCCGTCCAGCTCGACCAGGATGGGCACC  | ----CCGGTGAACAGCTCCTCGCCCTT  | $\Delta 3$ |
| 7 (Fig.4)   | TTACGTCGCCGTCCAGCTCGACCAGGATGGGCACCA | CCCGGTGAACAGCTCCTCGCCCTT     | +1         |
|             | TTACGTCGCCGTCCAGCTCGACCAGGATGGGCACC  | -----CGGTGAACAGCTCCTCGCCCTT  | $\Delta 4$ |

**Figure S6 | Mutated eGFP alleles possessed in founder fetuses.** The changes in the nucleotide sequence are shown in red and the type of changes (insertions: + or deletions:  $\Delta$ ) are indicated on the right-side of the sequences. All fetuses had only one type of mutation except the fetus 7 of Figure 4 which was a mosaic with two mutant alleles (shown in a box).
